# Supplementary material
Source: PubMed Central journal article supplement (PMC7964482)
Supplement: 3291_table.pdf [file 3291_table.pdf]

**On-line Table: Clinical and radiologic characteristics of the patient cohort**

|                                  | All Patients<br>(n = 55) (%) | Diffuse SAH<br>(n = 33) (%) | Perimes SAH<br>(n = 11) (%) | Periph SAH<br>(n = 11) (%) |
|----------------------------------|------------------------------|-----------------------------|-----------------------------|----------------------------|
| Sex                              |                              |                             |                             |                            |
| Male                             | 28 (51)                      | 20 (61)                     | 7 (64)                      | 1 (9)                      |
| Female                           | 27 (49)                      | 13 (39)                     | 4 (36)                      | 10 (91)                    |
| Family history of aneurysms      |                              |                             |                             |                            |
| Yes                              | 1 (2)                        | 0                           | 1 (9)                       | 0                          |
| No                               | 54 (98)                      | 33 (100)                    | 10 (91)                     | 11 (100)                   |
| Smoking history                  |                              |                             |                             |                            |
| Yes                              | 21 (38)                      | 12 (36)                     | 5 (45)                      | 4 (36)                     |
| No                               | 34 (62)                      | 21 (64)                     | 6 (55)                      | 7 (64)                     |
| Admission Hunt and Hess Scale    |                              |                             |                             |                            |
| 1                                | 17 (31)                      | 6 (18)                      | 8 (73)                      | 3 (27)                     |
| 2                                | 19 (35)                      | 12 (37)                     | 3 (27)                      | 4 (36)                     |
| 3                                | 14 (25)                      | 10 (30)                     | 0                           | 4 (36)                     |
| 4                                | 5 (9)                        | 5 (15)                      | 0                           | 0                          |
| Admission Fisher Scale           |                              |                             |                             |                            |
| 1                                | 0                            | 0                           | 0                           | 0                          |
| 2                                | 10 (18)                      | 0                           | 1 (9)                       | 9 (82)                     |
| 3                                | 30 (55)                      | 18 (55)                     | 10 (91)                     | 2 (18)                     |
| 4                                | 15 (27)                      | 15 (45)                     | 0                           | 0                          |
| Endovascular vasospasm treatment |                              |                             |                             |                            |
| Yes                              | 1 (2)                        | 1 (3)                       | 0                           | 0                          |
| No                               | 54 (98)                      | 32 (97)                     | 11 (100)                    | 11 (100)                   |
| ICU length of stay, days         |                              |                             |                             |                            |
| 0–1                              | 7 (13)                       | 1 (3)                       | 2 (18)                      | 4 (36)                     |
| 2–7                              | 23 (42)                      | 11 (33)                     | 7 (64)                      | 5 (46)                     |
| ≥8                               | 25 (45)                      | 21 (64)                     | 2 (18)                      | 2 (18)                     |
| Hospital length of stay, days    |                              |                             |                             |                            |
| 2–7                              | 20 (36)                      | 6 (18)                      | 6 (55)                      | 8 (73)                     |
| 8–14                             | 22 (40)                      | 14 (42)                     | 5 (45)                      | 3 (27)                     |
| ≥15                              | 13 (24)                      | 13 (40)                     | 0                           | 0                          |

**Note:**—Perimes indicates perimesencephalic; Periph, peripheral sulcal; ICU, intensive care unit.
